# Supplementary material for: Patients’ values and other decisional factors regarding treatment of hypercalcemia of malignancy: A Systematic Review Protocol
Source: Research Square preprint supplement (doi:10.21203/rs.3.rs-64830/v2), 2021-01-22
Supplement: Supplementary file 1 [file ce2186c3ab5cf2d6211be8ad.docx]

**Appendix 2A: Original search strategies**

1- Pubmed April 8, 2020

| [#12](https://www-ncbi-nlm-nih-gov.ezproxy.aub.edu.lb/pubmed) | Search #10 AND #11 |
| --- | --- |
| [#11](https://www-ncbi-nlm-nih-gov.ezproxy.aub.edu.lb/pubmed) | Search 2010/04:2020/04[crdt] |
| [#10](https://www-ncbi-nlm-nih-gov.ezproxy.aub.edu.lb/pubmed) | Search #8 AND #9 |
| [#9](https://www-ncbi-nlm-nih-gov.ezproxy.aub.edu.lb/pubmed) | Search “Attitude to Health”[MESH] OR Patient Participation[MESH:NOEXP] OR Patient Preference[MESH:NOEXP] OR Cost-Benefit Analysis[MESH:NOEXP] OR preference*[tw] OR choice*[tw] OR valu*[tw] OR expectation*[tw] OR attitude*[tw] OR acceptab*[tw] OR knowledg*[tw] OR sustain*[tw] OR barrier*[tw] ] OR access*[tw] OR implement*[tw] OR inequit*[tw] OR disparit*[tw] OR inequalit*[tw] OR income[tw] OR socioeconomic*[tw] OR gamble[tw] OR utility*[tw]OR health sat*[tw] OR adhere*[tw] OR quality life[tw] OR Qol[tw] OR willing*[tw]OR burden*[tw] OR satisf*[tw] OR opinion*[tw] OR Patient participation*[tw] OR patients participation*[tw] OR user participation*[tw] OR users participation*[tw] OR health participation*[tw] OR healthcare participation*[tw] OR health-care participation*[tw] OR Patient perception*[tw] OR patients perception*[tw] OR user perception*[tw] OR users perception*[tw] OR health perception*[tw] OR healthcare perception*[tw] OR health-care perception*[tw] OR (decision*[tw] AND (board*[tw] OR tool*[tw] OR analy*[tw] OR support[tw]) OR equit*[tw] OR equality[tw] OR feasib*[tw] OR perspective*[tw] OR cost*[tw] OR resource*[tw]) OR balance sect*[tw] OR discrete choice*[tw] OR ((“decision making”[mesh] OR decision mak*[tw]) AND (patient*[tw] OR user*[tw] OR Famil*[tw] OR customer*[tw] OR consumer*[tw] OR client*[tw] OR men[tw] OR man[tw] OR women[tw] OR woman[w] OR individual[tw] OR individuals[tw])) |
| [#8](https://www-ncbi-nlm-nih-gov.ezproxy.aub.edu.lb/pubmed) | Search #6 OR #7 |
| [#7](https://www-ncbi-nlm-nih-gov.ezproxy.aub.edu.lb/pubmed) | Search HHM[tw] or LOH[tw] |
| [#6](https://www-ncbi-nlm-nih-gov.ezproxy.aub.edu.lb/pubmed) | Search #1 AND #5 |
| [#5](https://www-ncbi-nlm-nih-gov.ezproxy.aub.edu.lb/pubmed) | Search #2 OR #3 OR #4 |
| [#4](https://www-ncbi-nlm-nih-gov.ezproxy.aub.edu.lb/pubmed) | Search (calcinos*[tw] OR hypercalcemi*[tw]) |
| [#3](https://www-ncbi-nlm-nih-gov.ezproxy.aub.edu.lb/pubmed) | Search Hypercalcemia [MESH:NOEXP] |
| [#2](https://www-ncbi-nlm-nih-gov.ezproxy.aub.edu.lb/pubmed) | Search Calcinosis[MESH:NOEXP] |
| [#1](https://www-ncbi-nlm-nih-gov.ezproxy.aub.edu.lb/pubmed) | Search (cancer*[tw] OR carcinoma*[tw] OR adenocarcinoma*[tw] OR hepatocarcinoma*[tw] OR carcinosarcoma*[tw] OR sarcoma*[tw] OR histiocytoma*[tw] OR fibrosarcoma*[tw] OR osteosarcoma*[tw] OR chondrosarcoma*[tw] OR lymphosarcoma*[tw] OR rhabdomyosarcoma*[tw] OR leukemi*[tw] OR leukaemi*[tw] OR erythroleukem*[tw] OR erythroleukaem*[tw] OR lymphoma*[tw] OR melanoma*[tw] OR hodgkin*[tw] OR multiple myeloma*[tw] OR mesothelioma*[tw] OR neoplas*[tw] OR malignan*[tw] OR metastas*[tw] OR carcinoid*[tw] OR neuroblastoma*[tw] OR Mycosis Fungoid*[tw] OR Sezary Syndrome*[tw] OR Retinoblastoma*[tw] OR pheochromocytoma*[tw] OR nephroblastoma*[tw] OR chORiocarcinoma*[tw] OR Pleuropulmonary Blastoma*[tw] OR glioblastoma*[tw] OR glioma*[tw] OR astrocytoma*[tw] OR ependymoma*[tw] OR medulloblastoma*[tw] OR meningioma*[tw] OR craniopharyngioma*[tw] OR myelodysplastic[tw] OR myeloproliferative[tw] OR macroglobulinemi*[tw] OR macroglobulinaemi*[tw] OR pineoblastoma*[tw] OR oncol*[tw] OR cyst[tw] OR tumor*[tw] OR tumour*[tw] OR Neoplasm [MESH] |

2- Medline (OVID) April 8, 2020

1 (cancer* or carcinoma* or adenocarcinoma* or hepatocarcinoma* or carcinosarcoma* or sarcoma* or histiocytoma* or fibrosarcoma* or osteosarcoma* or chondrosarcoma* or lymphosarcoma* or rhabdomyosarcoma* or leuk?emi* or erythroleukem* or erythroleukaem* or lymphoma* or melanoma* or hodgkin* or "multiple myeloma" or mesothelioma* or neoplas* or malignan* or metastas* or carcinoid* or neuroblastoma* or (Mycosis adj Fungoid?s) or (Sezary adj Syndrome) or Retinoblastoma* or pheochromocytoma* or nephroblastoma* or choriocarcinoma* or (Pleuropulmonary adj Blastoma?) or glioblastoma* or glioma* or astrocytoma* or ependymoma* or medulloblastoma* or meningioma* or craniopharyngioma* or myelodysplastic or myeloproliferative or macroglobulinemi* or macroglobulinaemi* or pineoblastoma* or oncol* or cyst or tumo?r*).mp. or exp Neoplasm/

2 Calcinosis/ or hypercalcemia/ or (calcinos?s or hypercalcemi*).mp.

3 (HHM or LOH).mp.

4 1 and 2

5 3 or 4

6 exp Attitude to Health/ or Patient Participation/ or Patient Preference/ or Cost-Benefit Analysis/ or (preference* or choice* or valu* or expectation? or attitude* or acceptab* or knowledg* or sustain* or barrier* or access* or implement* or inequit* or disparit* or inequalit* or income or socioeconomic* or gamble or utilit* or (health adj stat*) or adhere* or (quality adj2 life) or Qol or willing* or burden* or satisf* or opinion* or ((patient* or user* or health*) adj3 (participat* or perce*)) or (Decision adj3 (board* or tool* or analy* or support)) or equit* or equality or feasib* or perspective* or cost* or resource* or (balance adj1 sect*) or (discrete* adj1 choice*)).mp. or ((exp Decision Making/ or (decision* adj1 mak*).mp.) and (patient* or user* or Famil* or customer* or consumer* or client* or women or men or individual?).mp.)

7 5 and 6

8 limit 7 to ez="20100407-20200407"

3- Embase.com April 8, 2020

#14. #12 AND #13

#13. [1-4-2010]/sd

#12. #10 AND #11

#11. 'attitude to health'/exp OR 'patient participation'/de OR 'patient preference'/de OR 'cost benefit analysis'/de OR preference*:ti,ab,kw OR choice*:ti,ab,kw OR valu*:ti,ab,kw OR expectation$:ti,ab,kw OR attitude*:ti,ab,kw OR acceptab*:ti,ab,kw OR knowledg*:ti,ab,kw OR sustain*:ti,ab,kw OR barrier*:ti,ab,kw OR access*:ti,ab,kw OR implement*:ti,ab,kw OR inequit*:ti,ab,kw OR disparit*:ti,ab,kw OR inequalit*:ti,ab,kw OR income:ti,ab,kw OR socioeconomic*:ti,ab,kw OR gamble:ti,ab,kw OR utilit*:ti,ab,kw OR ((health NEXT/0 stat*):ti,ab,kw) OR adhere*:ti,ab,kw OR ((quality NEAR/2 life):ti,ab,kw) OR qol:ti,ab,kw OR willing*:ti,ab,kw OR burden*:ti,ab,kw OR satisf*:ti,ab,kw OR opinion*:ti,ab,kw OR (((patient* OR user* OR health*) NEAR/3 (participat* OR perce*)):ti,ab,kw) OR ((decision NEAR/3 (board* OR tool* OR analy* OR support)):ti,ab,kw) OR equit*:ti,ab,kw OR equality:ti,ab,kw OR feasib*:ti,ab,kw OR perspective*:ti,ab,kw OR cost:ti,ab,kw OR resource*:ti,ab,kw OR ((balance NEAR/1 sect*):ti,ab,kw) OR ((discrete* NEAR/1 choice*):ti,ab,kw) OR ('decision making'/exp AND (patient*:ti,ab,kw OR user*:ti,ab,kw OR famil*:ti,ab,kw OR customer*:ti,ab,kw OR consumer*:ti,ab,kw OR client*:ti,ab,kw OR women:ti,ab,kw OR men OR individual*:ti,ab,kw)) OR (((decision* NEAR/1 mak*):ti,ab,kw) AND (patient*:ti,ab,kw OR user*:ti,ab,kw OR famil*:ti,ab,kw OR customer*:ti,ab,kw OR consumer*:ti,ab,kw OR client*:ti,ab,kw OR women:ti,ab,kw OR men:ti,ab,kw OR individual*:ti,ab,kw))

#10. #8 OR #9

#9. #3 AND #7

#8. hhm:ti,ab,kw OR loh:ti,ab,kw

#7. #4 OR #5 OR #6

#6. calcinos$s:ti,ab,kw OR hypercalcemi:ti,ab,kw

#5. 'hypercalcemia'/de

#4. 'calcinosis'/de

#3. #1 OR #2

#2. 'neoplasm'/exp

#1. cancer*:ti,ab,kw OR carcinoma*:ti,ab,kw OR adenocarcinoma*:ti,ab,kw OR hepatocarcinoma*:ti,ab,kw OR carcinosarcoma*:ti,ab,kw OR sarcoma*:ti,ab,kw OR histiocytoma*:ti,ab,kw OR fibrosarcoma*:ti,ab,kw OR osteosarcoma*:ti,ab,kw OR chondrosarcoma*:ti,ab,kw OR lymphosarcoma*:ti,ab,kw OR rhabdomyosarcoma*:ti,ab,kw OR leukemi*:ti,ab,kw OR leukaemi*:ti,ab,kw OR erythroleukem*:ti,ab,kw OR erythroleukaem*:ti,ab,kw OR lymphoma*:ti,ab,kw OR melanoma*:ti,ab,kw OR hodgkin*:ti,ab,kw OR 'multiple myeloma':ti,ab,kw OR mesothelioma*:ti,ab,kw OR neoplas*:ti,ab,kw OR malignan*:ti,ab,kw OR metastas*:ti,ab,kw OR carcinoid*:ti,ab,kw OR neuroblastoma*:ti,ab,kw OR ((mycosis NEXT/0 fungoid$s):ti,ab,kw) OR ((sezary NEXT/0 syndrome):ti,ab,kw) OR retinoblastoma*:ti,ab,kw OR pheochromocytoma*:ti,ab,kw OR nephroblastoma*:ti,ab,kw OR choriocarcinoma*:ti,ab,kw OR ((pleuropulmonary NEXT/0 blastoma$):ti,ab,kw) OR glioblastoma*:ti,ab,kw OR glioma*:ti,ab,kw OR astrocytoma*:ti,ab,kw OR ependymoma*:ti,ab,kw OR medulloblastoma*:ti,ab,kw OR meningioma*:ti,ab,kw OR craniopharyngioma*:ti,ab,kw OR myelodysplastic:ti,ab,kw OR myeloproliferative:ti,ab,kw OR macroglobulinemi*:ti,ab,kw OR macroglobulinaemi*:ti,ab,kw OR pineoblastoma*:ti,ab,kw OR oncol*:ti,ab,kw OR cyst:ti,ab,kw OR tumo$r*:ti,ab,kw

4- CINAHL (EBSCO) April 9, 2020:

| S29 | MW S14 AND S28 |
| --- | --- |
| S28 | S15 OR S16 OR S17 OR S18 OR S24 OR S25 OR S26 OR S27 |
| S27 | MW (preference* OR choice* OR valu* OR expectation# OR attitude* OR acceptab* OR knowledg*) OR sustain* OR barrier* OR access* OR implement* OR inequit* OR disparit* OR inequalit* OR income OR socioeconomic* OR gamble OR utilit* OR ((health W0 stat*)) OR adhere* OR ((quality N2 life)) OR qol OR willing* OR burden* OR satisf* OR opinion* OR (((patient* OR user* OR health*) N3 (participat* OR perce*))) OR ((decision N3 (board* OR tool* OR analy* OR support))) OR equit* OR equality OR feasib* OR perspective* OR cost OR resource* OR ((balance N1 sect*)) OR ((discrete* N1 choice*)) OR (((decision* N1 mak*)) AND (patient* OR user* OR famil* OR customer* OR consumer* OR client* OR women OR woman OR men OR man OR individual*)) |
| S26 | AB (preference* OR choice* OR valu* OR expectation# OR attitude* OR acceptab* OR knowledg*) OR sustain* OR barrier* OR access* OR implement* OR inequit* OR disparit* OR inequalit* OR income OR socioeconomic* OR gamble OR utilit* OR ((health W0 stat*)) OR adhere* OR ((quality N2 life)) OR qol OR willing* OR burden* OR satisf* OR opinion* OR (((patient* OR user* OR health*) N3 (participat* OR perce*))) OR ((decision N3 (board* OR tool* OR analy* OR support))) OR equit* OR equality OR feasib* OR perspective* OR cost OR resource* OR ((balance N1 sect*)) OR ((discrete* N1 choice*)) OR (((decision* N1 mak*)) AND (patient* OR user* OR famil* OR customer* OR consumer* OR client* OR women OR woman OR men OR man OR individual*)) |
| S25 | TI (preference* OR choice* OR valu* OR expectation# OR attitude* OR acceptab* OR knowledg*) OR sustain* OR barrier* OR access* OR implement* OR inequit* OR disparit* OR inequalit* OR income OR socioeconomic* OR gamble OR utilit* OR ((health W0 stat*)) OR adhere* OR ((quality N2 life)) OR qol OR willing* OR burden* OR satisf* OR opinion* OR (((patient* OR user* OR health*) N3 (participat* OR perce*))) OR ((decision N3 (board* OR tool* OR analy* OR support))) OR equit* OR equality OR feasib* OR perspective* OR cost OR resource* OR ((balance N1 sect*)) OR ((discrete* N1 choice*)) OR (((decision* N1 mak*)) AND (patient* OR user* OR famil* OR customer* OR consumer* OR client* OR women OR woman OR men OR man OR individual*)) |
| S24 | S19 AND S23 |
| S23 | S20 OR S21 OR S22 |
| S22 | MW patient* OR user* OR famil* OR customer* OR consumer* OR client* OR women OR woman OR men OR man OR individual* |
| S21 | AB patient* OR user* OR famil* OR customer* OR consumer* OR client* OR women OR woman OR men OR man OR individual* |
| S20 | TI patient* OR user* OR famil* OR customer* OR consumer* OR client* OR women OR woman OR men OR man OR individual* |
| S19 | (MH "Decision Making+") |
| S18 | (MH "Cost Benefit Analysis") |
| S17 | (MH "Patient Preference") |
| S16 | (MH "Consumer Participation") |
| S15 | (MH "Attitude to Health+") |
| S14 | S12 OR S13 |
| S13 | TI HHM OR LOH |
| S12 | S10 AND S11 |
| S11 | S5 OR S6 OR S7 OR S8 OR S9 |
| S10 | S1 OR S2 OR S3 OR S4 |
| S9 | MW calcinos* OR hypercalcemi* |
| S8 | AB calcinos* OR hypercalcemi* |
| S7 | TI calcinos* OR hypercalcemi* |
| S6 | (MH "Hypercalcemia") |
| S5 | (MH "Calcinosis") |
| S4 | MW TI (cancer* OR carcinoma* OR adenocarcinoma* OR hepatocarcinoma* OR carcinosarcoma* OR sarcoma* OR histiocytoma* OR fibrosarcoma* OR osteosarcoma* OR chondrosarcoma* OR lymphosarcoma* OR rhabdomyosarcoma* OR leukemi* OR leukaemi* OR erythroleukem* OR erythroleukaem* OR lymphoma* OR melanoma* OR hodgkin* OR 'multiple myeloma'OR mesothelioma* OR neoplas* OR malignan* OR metastas* OR carcinoid* OR neuroblastoma* OR ((mycosis W0 fungoid#s)) OR ((sezary W0 syndrome)) OR retinoblastoma* OR pheochromocytoma* OR nephroblastoma* OR choriocarcinoma* OR ((pleuropulmonary W0 blastoma#)) OR glioblastoma* OR glioma* OR astrocytoma* OR ependymoma* OR medulloblastoma* OR meningioma* OR craniopharyngioma* OR myelodysplastic OR myeloproliferative OR macroglobulinemi* OR macroglobulinaemi* OR pineoblastoma* OR oncol* OR cyst OR tumo#r*) |
| S3 | AB TI (cancer* OR carcinoma* OR adenocarcinoma* OR hepatocarcinoma* OR carcinosarcoma* OR sarcoma* OR histiocytoma* OR fibrosarcoma* OR osteosarcoma* OR chondrosarcoma* OR lymphosarcoma* OR rhabdomyosarcoma* OR leukemi* OR leukaemi* OR erythroleukem* OR erythroleukaem* OR lymphoma* OR melanoma* OR hodgkin* OR 'multiple myeloma'OR mesothelioma* OR neoplas* OR malignan* OR metastas* OR carcinoid* OR neuroblastoma* OR ((mycosis W0 fungoid#s)) OR ((sezary W0 syndrome)) OR retinoblastoma* OR pheochromocytoma* OR nephroblastoma* OR choriocarcinoma* OR ((pleuropulmonary W0 blastoma#)) OR glioblastoma* OR glioma* OR astrocytoma* OR ependymoma* OR medulloblastoma* OR meningioma* OR craniopharyngioma* OR myelodysplastic OR myeloproliferative OR macroglobulinemi* OR macroglobulinaemi* OR pineoblastoma* OR oncol* OR cyst OR tumo#r*) |
| S2 | TI TI (cancer* OR carcinoma* OR adenocarcinoma* OR hepatocarcinoma* OR carcinosarcoma* OR sarcoma* OR histiocytoma* OR fibrosarcoma* OR osteosarcoma* OR chondrosarcoma* OR lymphosarcoma* OR rhabdomyosarcoma* OR leukemi* OR leukaemi* OR erythroleukem* OR erythroleukaem* OR lymphoma* OR melanoma* OR hodgkin* OR 'multiple myeloma'OR mesothelioma* OR neoplas* OR malignan* OR metastas* OR carcinoid* OR neuroblastoma* OR ((mycosis W0 fungoid#s)) OR ((sezary W0 syndrome)) OR retinoblastoma* OR pheochromocytoma* OR nephroblastoma* OR choriocarcinoma* OR ((pleuropulmonary W0 blastoma#)) OR glioblastoma* OR glioma* OR astrocytoma* OR ependymoma* OR medulloblastoma* OR meningioma* OR craniopharyngioma* OR myelodysplastic OR myeloproliferative OR macroglobulinemi* OR macroglobulinaemi* OR pineoblastoma* OR oncol* OR cyst OR tumo#r*) |
| S1 | (MH "Neoplasms+") |

5- Cochrane April 9, 2020:

#1 MeSH descriptor: [Neoplasms] explode all trees

#2 cancer*:ti,ab,kw OR carcinoma*:ti,ab,kw OR adenocarcinoma*:ti,ab,kw OR hepatocarcinoma*:ti,ab,kw OR carcinosarcoma*:ti,ab,kw OR sarcoma*:ti,ab,kw OR histiocytoma*:ti,ab,kw OR fibrosarcoma*:ti,ab,kw OR osteosarcoma*:ti,ab,kw OR chondrosarcoma*:ti,ab,kw OR lymphosarcoma*:ti,ab,kw OR rhabdomyosarcoma*:ti,ab,kw OR leukemi*:ti,ab,kw OR leukaemi*:ti,ab,kw OR erythroleukem*:ti,ab,kw OR erythroleukaem*:ti,ab,kw OR lymphoma*:ti,ab,kw OR melanoma*:ti,ab,kw OR hodgkin*:ti,ab,kw OR 'multiple myeloma':ti,ab,kw OR mesothelioma*:ti,ab,kw OR neoplas*:ti,ab,kw OR malignan*:ti,ab,kw OR metastas*:ti,ab,kw OR carcinoid*:ti,ab,kw OR neuroblastoma*:ti,ab,kw OR ((mycosis NEXT fungoid$s):ti,ab,kw) OR ((sezary NEXT syndrome):ti,ab,kw) OR retinoblastoma*:ti,ab,kw OR pheochromocytoma*:ti,ab,kw OR nephroblastoma*:ti,ab,kw OR choriocarcinoma*:ti,ab,kw OR ((pleuropulmonary NEXT blastoma$):ti,ab,kw) OR glioblastoma*:ti,ab,kw OR glioma*:ti,ab,kw OR astrocytoma*:ti,ab,kw OR ependymoma*:ti,ab,kw OR medulloblastoma*:ti,ab,kw OR meningioma*:ti,ab,kw OR craniopharyngioma*:ti,ab,kw OR myelodysplastic:ti,ab,kw OR myeloproliferative:ti,ab,kw OR macroglobulinemi*:ti,ab,kw OR macroglobulinaemi*:ti,ab,kw OR pineoblastoma*:ti,ab,kw OR oncol*:ti,ab,kw OR cyst:ti,ab,kw OR tumo$r*:ti,ab,kw

#3 #1 or #2

#4 MeSH descriptor: [Calcinosis] this term only

#5 MeSH descriptor: [Hypercalcemia] this term only

#6 calcinos*:ti,ab OR hypercalcemi*:ti,ab

#7 #4 or #5 or #6

#8 #3 and #7

#9 hhm:ti,ab OR loh:ti,ab

#10 #8 or #9

#11 MeSH descriptor: [Attitude to Health] explode all trees

#12 MeSH descriptor: [Patient Participation] this term only

#13 MeSH descriptor: [Patient Preference] this term only

#14 MeSH descriptor: [Cost-Benefit Analysis] this term only

#15 MeSH descriptor: [Decision Making] explode all trees

#16 (patient*:ti,ab,kw OR user*:ti,ab,kw OR famil*:ti,ab,kw OR customer*:ti,ab,kw OR consumer*:ti,ab,kw OR client*:ti,ab,kw OR women:ti,ab,kw OR woman:ti,ab,kw OR men:ti,ab,kw OR man:ti,ab,kw OR individual?:ti,ab,kw)

#17 #15 AND #16

#18 ((decision NEAR/3 (board* OR tool* OR analy* OR support)):ti,ab,kw) OR equit*:ti,ab,kw OR equality:ti,ab,kw OR feasib*:ti,ab,kw OR perspective*:ti,ab,kw OR cost:ti,ab,kw OR resource*:ti,ab,kw OR ((balance NEAR/1 sect*):ti,ab,kw) OR ((discrete* NEAR/1 choice*):ti,ab,kw) OR (((decision* NEAR/1 mak*):ti,ab,kw) AND (patient*:ti,ab,kw OR user*:ti,ab,kw OR famil*:ti,ab,kw OR customer*:ti,ab,kw OR consumer*:ti,ab,kw OR client*:ti,ab,kw OR women:ti,ab,kw OR woman:ti,ab,kw OR men:ti,ab,kw OR man:ti,ab,kw OR individual*:ti,ab,kw))

#19 (preference*:ti,ab,kw OR choice*:ti,ab,kw OR valu*:ti,ab,kw OR expectation$:ti,ab,kw OR attitude*:ti,ab,kw OR acceptab*:ti,ab,kw OR knowledg*:ti,ab,kw) OR sustain*:ti,ab,kw OR barrier*:ti,ab,kw OR access*:ti,ab,kw OR implement*:ti,ab,kw OR inequit*:ti,ab,kw OR disparit*:ti,ab,kw OR inequalit*:ti,ab,kw OR income:ti,ab,kw OR socioeconomic*:ti,ab,kw OR gamble:ti,ab,kw OR utilit*:ti,ab,kw OR ((health NEXT stat*):ti,ab,kw) OR adhere*:ti,ab,kw OR ((quality NEAR/2 life):ti,ab,kw) OR qol:ti,ab,kw OR willing*:ti,ab,kw OR burden*:ti,ab,kw OR satisf*:ti,ab,kw OR opinion*:ti,ab,kw OR (((patient* OR user* OR health*) NEAR/3 (participat* OR perce*)):ti,ab,kw)

#20 #11 OR #12 OR #13 OR #14 OR #17 OR #18 OR #19

#21 #10 AND #20

#22 #10 AND #20 with Cochrane Library publication date Between Apr 2010 and Apr 2020

**Appendix 2B: Second independent search strategy**

 Medline (OVID) May 8, 2020

1 hypercalcemia.mp. or exp Hypercalcemia/

2 cancer.mp. or exp Neoplasms/

3 1 and 2

4 patient preference.mp. or exp Patient Preference/

5 decision making.mp. or exp Decision Making/

6 values.mp. or exp Social Values/

7 cost.mp. or exp "Costs and Cost Analysis"/

8 "Delivery of Health Care"/ or Health Equity/ or equity.mp. or Health Services Accessibility/ or Health Status Disparities/

9 trade off.mp.

10 standard gamble.mp. or Attitude to Health/

11 patient satisfaction.mp. or exp Patient Satisfaction/

12 feasibility.mp.

13 accessability.mp.

14 4 or 5 or 6 or 7 or 8 or 9 or 10 or 11 or 12 or 13

15 3 and 14

16 remove duplicates from 15
